# Supplementary material for: Optimization of the standard genetic code according to three codon positions using an evolutionary algorithm
Source: PubMed Central journal article supplement (PMC6084934; doi:10.1371/journal.pone.0201715), 2018-08-09

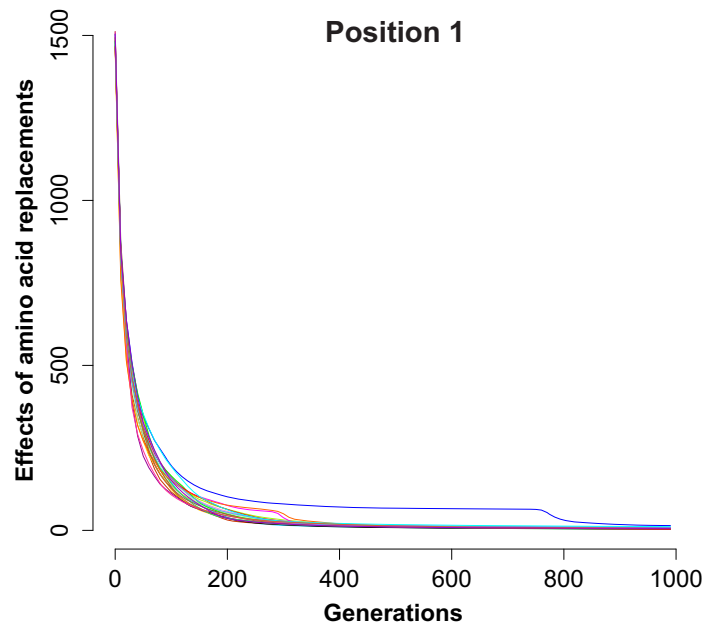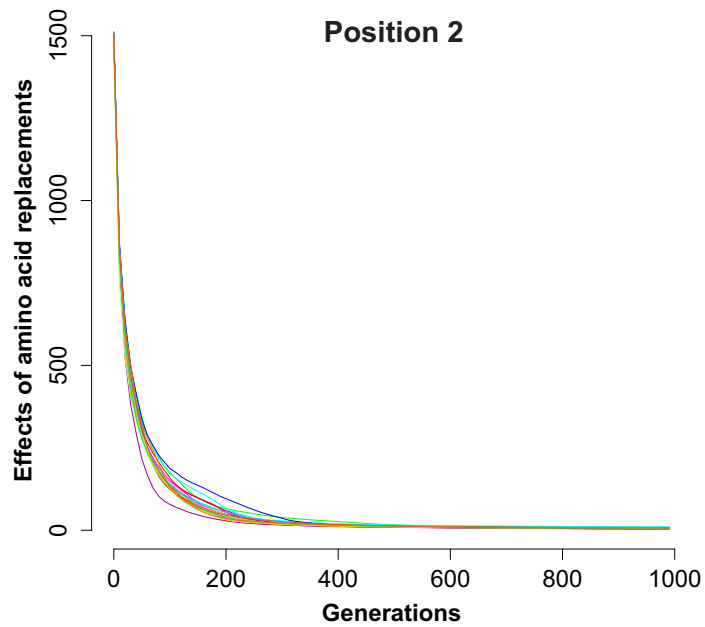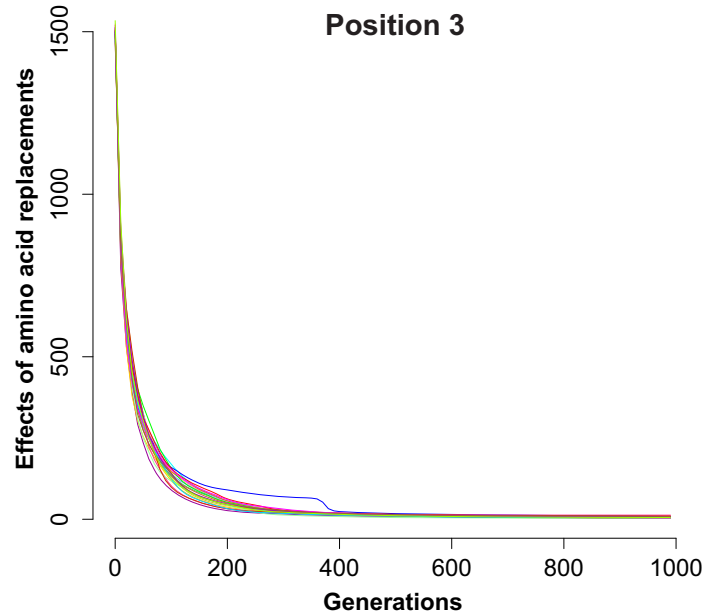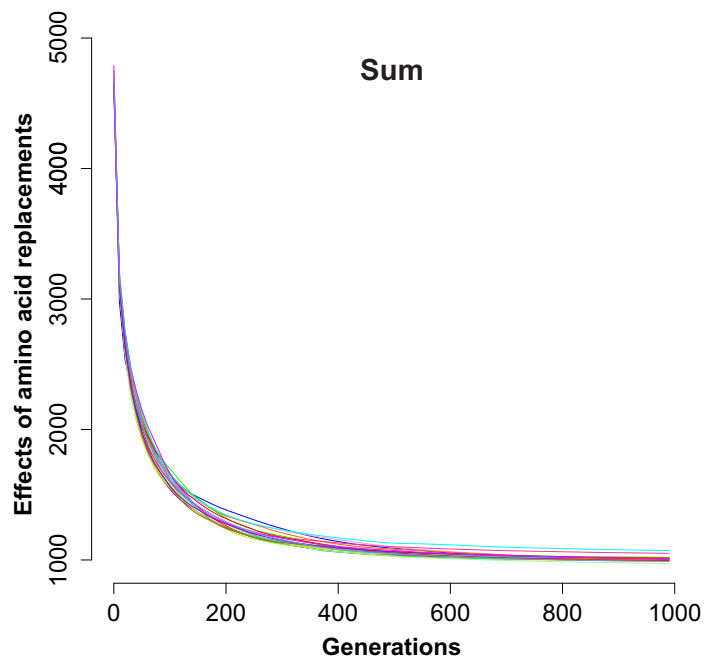

Supplement: pone.0201715.s001.pdf [file pone.0201715.s001.pdf]
